1 Structure Prediction of Repeats  
2

1 **Accurate contact-based modelling of repeat proteins predicts the structure of**  
2 **Curlin and SPW repeats.**

3

4 Claudio Bassot\* and Arne Elofsson\*

5

6 \* Science for Life Laboratory and Dep of Biochemistry and Biophysics, Stockholm  
7 University.

8

## 9 **Abstract**

10 Repeat proteins are an abundant class in eukaryotic proteomes. They are involved in many  
11 eukaryotic specific functions, including signalling. For many of these families, the structure is  
12 not known. Recently, it has been shown that the structure of many protein families can be  
13 predicted by using contact predictions from direct coupling analysis and deep learning.  
14 However, their unique sequence features present in repeat proteins is a challenge for  
15 contact predictions DCA-methods. Here, we show that using the deep learning-based  
16 PconsC4 is more effective for predicting both intra and interunit contacts among a  
17 comprehensive set of repeat proteins. In a benchmark dataset of 819 repeat proteins about  
18 one third can be correctly modelled and among 51 PFAM families lacking a protein structure,  
19 we produce models of five families with estimated high accuracy.

20

## 21 **Author Summary**

22 Repeat proteins are widespread among organisms and particularly abundant in eukaryotic

#### 4 Structure Prediction of Repeats

5

23 proteomes. Their primary sequence present repetition in the amino acid sequences that  
24 origin structures with repeated folds/domains. Although the repeated units are easy to be  
25 recognized in primary sequence, often structure information are missing. Here we used  
26 contact prediction for predicting the structure of repeats protein directly from their primary  
27 sequences. We benchmark our method on a dataset comprehensive of all the known  
28 repeated structures. We evaluate the contact predictions and the obtained models set for  
29 different classes of proteins and different lengths of the target, and we benchmark the quality  
30 assessment of the models on repeats proteins. Finally, we applied the methods on the  
31 repeat PFAM families missing of resolved structures, five of them modelled with high  
32 accuracy.

33

#### 34 **Introduction**

35 Repeat proteins contain periodic units in the primary sequence that are likely the result of  
36 duplication event at the genetic level [1]. Repeat proteins emerge through replication  
37 slippage [2] and double-strand break repair [3]. This protein class is present in all genomes  
38 but is more frequent in eukaryotic organisms [4–6] where they are involved in a wide range  
39 of functions [7]. In particular, due to their extended structures repeat proteins often behave  
40 as molecular scaffolds in protein signalling or for protein complexes as WD40 domain [8], or  
41 ankyrin repeats [9,10].

42 Repeat proteins are often conserved among orthologs [4,11] while exhibiting a more  
43 accelerated evolution and divergence among paralogs [11].

44 A classification of repeat proteins was proposed by Kajava [12,13] based on the length of  
45 the repeat units and the tertiary structure of the repeat units. According to Kajava's  
46 classification, there are five classes of repeat proteins. However, in this study, we ignore  
47 class I and II because there are no available structures for class I, and class II structures are  
48 folded in a coiled-coil structure easy to be predicted. Moreover, the extreme amino acid

6

2

## 7 Structure Prediction of Repeats

8

49 compositional bias of many of these proteins makes it very hard to find the coevolving  
50 residues in these classes.

51 The dataset used in our study contains three classes of proteins divided into 20 subclasses  
52 divided by their secondary structure, according to RepeatsDB [14] Fig 1. The three classes  
53 are class III containing extended repeats (e.g.  $\alpha$  and  $\beta$  solenoids), class IV containing closed  
54 repeats structures (e.g. TIM and  $\beta$  barrels and  $\beta$ -propeller), class V where the units appear  
55 as separate domains on a string. The units are also longer in class V than in other classes.

56

57 **Figure1. Repeats proteins classification.** Representation of the repeats classes and  
58 subclasses as classified in repeatsDB 2.0 [14]

59

60 Class III is dominated by solenoid structures (Figure1 III.1, III.2 III.3) [13], and there is a wide  
61 range in the numbers of units (from 4 to 38). Also, the length of the individual unit is widely  
62 variable, e.g.  $\beta$ -solenoid have significantly shorter repeats compared with  $\alpha$  and  $\alpha/\beta$  solenoid  
63 [13]. Two subclasses:  $\beta$ -trefoil/ $\beta$ -hairpins, anti-parallel and  $\beta$ -layer/ $\beta$ -hairpins form extended  
64 beta strands without the bend typical of the solenoid.

65 Members of class IV are constrained in variability by the closed fold. Indeed despite ten  
66 subclasses of different units fold the number of units go from 3 to 16, and the proteins with  
67 more than ten units are rare. The length of the units is in between class III and V [13].

68 Class V has the longest units, which fold into proper domains and also a low number of units  
69 with few interactions between them.

70 However, many repeat proteins lack a resolved structure or a template to perform homology  
71 modelling. Residue-residue contact prediction is the most promising template free method  
72 [15]. Contact prediction methods identify residues co-evolution from multiple sequence

## 10 Structure Prediction of Repeats

11

73 alignment and identify the evolutionary constraints of the residues imposed by the tertiary  
74 protein structure [16]. Nevertheless, repeat proteins are a difficult target for contact  
75 prediction; the internal symmetry introduces artefacts in the contact map at a distance  
76 corresponding to the repeated units [17].

77 Here, we benchmark the deep-learning-based contacts prediction program PconsC4 [18]  
78 against the GaussDCA [19] on a comprehensive dataset generated from RepeatsDB [14].  
79 The predicted contacts were then used as constraints to generate proteins model, and their  
80 quality was then tested by Pcons [20]. On the base of the benchmark, we propose models  
81 for the protein structures of PFAM protein families missing of resolved structures.

82

## 83 Results and Discussion

### 84 General contact prediction analysis in repeat proteins

85 To assess the quality of the contacts predictions among repeat protein classes, we generate  
86 a dataset of proteins, clustering at 40% of identity, the reviewed entries of RepeatsDB [14].  
87 For each repeats region present in the dataset we extract the sequence of a representative  
88 repeat unit and a pair of repeats, obtaining in this way three datasets: i) a single unit  
89 datasets; ii) a double unit datasets; iii) complete region datasets.

90 For all the three sets of proteins, multiple sequence alignments (MSA) and secondary  
91 structure predictions were generated. Subsequently using the MSA as input for PconsC4  
92 and GaussDCA [19] contacts were predicted for each family. The performance of the contact  
93 predictions was evaluated for each subclass separately. As expected, PconsC4 over-  
94 perform GaussDCA in all the three sets and all the classes of repeat proteins, Figure 2.

95

96 *Figure2. Precision of contact predictions. Positive Predicted Value (PPV) for the*

13 Structure Prediction of Repeats

14

97 *GaussDCA (red) and Pconsc4 (Blue) contact prediction for each subclass. In light colour the*  
98 *single unit dataset, in medium colour the double units dataset, and in dark colour the*  
99 *complete region dataset.*

100

101 Here, it should be remembered that Pconsc4 use the GaussDCA prediction as an input for  
102 the U-net [32] that learn to recognize specific contacts patterns [18].

103 In general, the predictions for the full length regions (darker colors in Fig. 2) give better  
104 results than split the proteins into units but with some exceptions. In particular in class V,  
105 that is composed by bigger units forming repeats of the “beds on a string” type, the splitting  
106 in units may help, especially in some subclasses, to reach better contacts prediction  
107 performance as discussed later.

108 Furthermore, Pconsc4 appear efficient in removing the DCA repeats artefacts compared  
109 with GaussDCA. In Fig. 3 are shown some contact maps examples. In the GaussDCA  
110 predictions are evident the periodic artefacts of wrong predictions (red dots) forming  
111 perpendicular lines. These appear to be contacts between equivalent positions in the repeat  
112 unit.

113

114 *Figure 3. GaussDCA and Pconsc4 contact maps. Contact map for a prediction with a)*  
115 *GaussDCA b) Pconsc4. In grey, the real contacts from the structure, in green the corrected*  
116 *predicted value, in red the false predicted value.*

117

118 Finally, it is well known that the quality of the prediction is directly correlated with the number  
119 of sequences in the starting MSA, especially for the DCA methods [18]. The same trend is  
120 confirmed among protein repeats, Fig. 4, where the repeats with a smaller MSA are

## 16 Structure Prediction of Repeats

17

121 predicted with lower PPV. PconsC4 and GaussDCA show the same pattern in the average  
122 PPV except for an increase of the PPV for PconsC4 with MSA with a Neff Higher than 12.

123

124 *Figure 4. PPV versus Neff. Positively Predicted Value for GaussDCA in red and PconsC4 in*  
125 *Blue on the Neff value (number of effective sequences length weighted with length).*

126

## 127 Differences among repeat classes in contacts prediction

128 Fig. 2 shows variations in the percentage of correct contacts among different protein repeat  
129 classes and subclasses, to clarify the origin of these differences, we investigated more in-  
130 depth the origin of the predicted contacts.

131 One central aspect that affects the difficulty of prediction is due to the pattern of contacts  
132 [33]. In general, contacts that are parts of larger interaction areas are better predicted as well  
133 as interactions between residues that are close in the sequence. A comparison between the  
134 intra-unit and inter-unit contacts are shown in Fig 5a. Here, we obtained the number of intra  
135 and inter-unit contacts from the PDB structures and we selected the same number of intra  
136 and inter units from the contact predictions. The PPV was finally calculated as the number of  
137 correct contacts over the number of the selected contacts.

138 On average the intra-units contacts are predicted with higher accuracy than the inter-unit  
139 one, but this is not true for all protein classes. This behaviour is due to significant differences  
140 of the units structures among the classes: in class III the unit are short, and the residues  
141 form contacts mostly with the neighbour units; in class V, on the contrary, the units are long,  
142 folded in independent domains and the contacts are predominantly inside the units with few  
143 inter-unit contacts; class IV is halfway between class III and V. The inter units contacts of  
144 class III and partially of class IV results easier do be predicted then class V ones, because  
145 they form clearer patterns in contact maps. On the contrary, the intra-unit contacts of class V

## 19 Structure Prediction of Repeats

20

146 are predicted better than class III and IV for the same reason. We plot the PPV versus the  
147 ratio of the inter-unit contacts over the total number of contacts of each protein. The PPV  
148 show an inverse relation with the ratio of inter-unit contact of the protein (Figure 5.b,c,d).

149 The inter-units PPV is low for the proteins with an inter-contact ratio lower than 20%  
150 constituting class V. Figure 5c shows the lowest inter-units contacts PPV while the PPV  
151 between inter- and intra- contacts invert the trends at a ratio of 80%. This switch  
152 corresponds to solenoid structures and TIM Barrel that have a ratio between 80%-100%  
153 larger interaction surfaces between different units than inside a single unit.

154

155 **Figure 5. Predicted contacts analysis.** *Positive Predicted Value (PPV) obtained by*  
156 *PconsC4 for different types of contacts. a) Examples of inter- and intra- unit contacts. b) In*  
157 *red, the PPV for intra-units contacts in blue PPV for inter-units contact. c) Repeats*  
158 *subclasses. In red, the PPV for intra-units contacts in blue PPV for inter-units contact, colors*  
159 *and shapes in the scatter plot indicate different protein subclasses. d) Secondary structure.*  
160 *In red, the overall PPV, in blue, the  $\alpha$ -helical subclasses, in green, the  $\alpha$ -helix/ $\beta$ -strand*  
161 *subclasses, and in orange, the  $\beta$ -strand subclasses.*

162

163 In Figure 5d, we divided the proteins into their secondary structure class. Proteins  
164 subclasses containing only  $\beta$ -strand or  $\alpha$ -helix/ $\beta$ -strand appear easier to predict. The plots  
165 show a steep decrease in the PPV values around the ratio of 50% helix for both intra- and  
166 inter-units contacts. This is due to the  $\alpha$ -helix subclasses component.  $\alpha$ -helix are harder to  
167 predict because they produce a less clear contact pattern compared with  $\beta$ -strand.

168

## 169 Protein model generation and quality assessment

## 22 Structure Prediction of Repeats

23

170 Proteins models were generated using CONFOLD [28] starting from the contact predictions  
171 of PconsC4 and the PSIPred secondary structure as constraints. In Fig. 6 we compare the  
172 TM-score between the first model ranked by CONFOLD and the corresponding PDB protein  
173 structure.

174

175 **Figure 6. Protein model quality.** *a) TM-score in all the subfamilies. In sea-green the single*  
176 *unit prediction, in blue the double units prediction, in red the complete region prediction. b)*  
177 *TM-score of the subfamilies of class V. In green the single unit prediction and in brown the*  
178 *prediction of that unit when the entire region is modelled.*

179

180 Although the best contact predictions were, on average, obtained with the complete regions,  
181 still splitting the structure lead in some cases to a better model; this is true in particular for  
182 the “Beads on a string” class V, but single-unit models are also useful in the “propeller”  
183 subclasses class IV: IV.4  $\beta$  propeller, IV.8  $\alpha/\beta$  propeller and IV.5  $\alpha/\beta$  prism. Moreover  
184 modelling a couple of units lead to the best models in two subclass III.3  $\alpha$  solenoid IV.10  
185 and aligned prism. All these subclasses except  $\alpha$ -solenoid have a low ratio of inter-units  
186 contacts (below 50%) Fig. 5b, however  $\alpha$ -solenoid where the complete protein reaches in  
187 some cases a length of 1000 residues. Moreover, the bend of the protein is very difficult to  
188 predict, and the models result in a series of straight helices.

189 It is questionable if the lower quality of the models of the complete region is due to a general  
190 decrease in the performance or only to the impossibility to model the correct interaction  
191 among different domains. To answer this question, we analysed more in deeper class V,  
192 where the decrease in the performance is most evident. We extract from the “complete  
193 region model” the same units and the units previously modelled as single and double units  
194 Fig. 6b. Interestingly, even the single units and the double units extracted from the complete  
195 region modelling have a lower or similar accuracy compared with the single and double units



## 25 Structure Prediction of Repeats 26

196 modelled alone, Figure 6b. This is observed is regardless of the quality of the prediction of  
197 the contacts in the complete region prediction, Fig. 2, suggesting that the poor performance  
198 is not only due to the more difficult prediction of the interdomain contacts but also due to a  
199 limitation of the modelling of longer proteins.

200

201 In order to evaluate the model quality, we plot the TM-scores of the models against the score  
202 obtained from the quality assessment method Pcons [20], Fig. 7. In light of this result, we  
203 consider the models of a complete repeats region reasonably correct when they reach a  
204 Pcons score of 0.4. The complete dataset with Pcons prediction is reported in Table S1.

205

206 **Figure 7. TM-score versus Pcons-score.** *TM-score versus Pcons-score for complete*  
207 *region models.*

208

## 209 **Modelling of repeat proteins without resolved structures**

210 In order to predict the structure of new repeats families, we selected 51 PFAM repeats family  
211 without resolved structure. A representative sequence of each family was run against  
212 Uniclust30 with HHpred, and the resulting MSA was used to predict the contact map that  
213 was used together with the PSIPred prediction as constraints to generate the models.

214 All the models were evaluated with Pcons, but only five of them reach a Pcons score higher  
215 than 0.4. These are the PFAM family; MORN 2, SPW, Curlin rpt, RTTN N, RHS repeat,  
216 Table 1 (In Supplementary the target/template alignments).

217 In order to further prove the reliability of these models and perform a more comprehensive  
218 protein modelling approach, we associated homology modelling and the contact-based  
219 modelling approach. For three out of five proteins, HHsearch returned a highly reliable

28 Structure Prediction of Repeats

29

220 template, Table 1.

221

| PFAM Family             | Representative sequence (Uniprot ID) | Pcons score  | Template with seq. coverage > 70% (PDB ID) | HHsearch probability | TM score contact model/homology model |
|-------------------------|--------------------------------------|--------------|--------------------------------------------|----------------------|---------------------------------------|
| <b>MORN 2 (PF07661)</b> | <b>Q8RH85</b>                        | <b>0.711</b> | <b>1MUF_A</b>                              | <b>99.37</b>         | <b>0.5003</b>                         |
| SPW                     | A0A2A3HD64                           | 0.674        | 5EQC_A                                     | 29.35                | /                                     |
| Curlin rpt              | Q8EIH3                               | 0.576        | 2N59_A                                     | 1.97                 | /                                     |
| <b>RTTN N (PF14726)</b> | <b>W5P499</b>                        | <b>0.490</b> | <b>4U2X_E</b>                              | <b>94.03</b>         | <b>0.3529</b>                         |
| <b>RHS repeat</b>       | <b>A0A1G0MXS8</b>                    | <b>0.407</b> | <b>5KIS_B</b>                              | <b>99.46</b>         | <b>0.5823</b>                         |

222

223 In Fig. 8, the superimposition between homology modelling and contact based model is  
 224 shown. In all three the protein family there is a substantial agreement between the two  
 225 approaches. MORN 2 family contact-based and homology model are in agreement except  
 226 for loops and the bend of the central beta-strand.

227

228 **Figure 8. High quality protein models.** a) Superimposition between the contact-based  
 229 models and the Homology Model performed with Chimera [34] and their respective TM-  
 230 score. In red, the contact-based models and in light blue Homology models. b) Protein  
 231 model of SPW family in the membrane (light brown). On the left in blue and red the two  
 232 repeated units on the right in red the SPW motif. c) Protein model of Curlin repeats, in blue

31 Structure Prediction of Repeats

32

233 *and red the repeated units.*

234

235 The RTTN N is the family showing the lowest TM-score between the two models mostly due  
236 to a different rearrangement of the firsts three alpha-helices. Has to be mentioned, however,  
237 that despite a high probability score, the identity between the target and the best template is  
238 only 7% (Figure S1b) making hard to determine which is the best model.

239 In RHS repeat family, the score between the contact-based models and the homology model  
240 share a TM-score of 0.58. Only the N terminal is modelled in a different with an extra beta-  
241 strand in the contact-based model and an alpha helix in the template-based modelling.  
242 However, we argue that in this case, the contact-based modelling overperform the Homology  
243 model; indeed the contact prediction mode is in agreement with the secondary structure  
244 prediction that predicts an N-terminal Beta strand (Figure S1c).

245 The remaining two PFAM families do not have suitable templates, and contact-based  
246 modelling is the best suitable method for model them.

247

248 **SPW family**

249 According to the PFAM database, the SPW family is present in Bacteria and Archaea in one  
250 or two units, and in a few cases in association with a Vitamin K epoxide reductase or NAD-  
251 dependent epimerase/dehydratase domain. Each repeated unit is formed by two  
252 transmembrane alpha-helices and is characterized by an SPW motive [35]. According to our  
253 model, the repeated motifs is buried in the membrane symmetrically located close to the  
254 extracellular side, Fig. 8b. PFAM architectures show many proteins with only a single SPW  
255 motif however a more careful analysis of these sequences shows that in many cases they  
256 contain a second degenerate SPW unit before or after the one identified where however the  
257 proline residue is conserved (Figure S2).

## 34 Structure Prediction of Repeats

35

258 The Tryptophan is on the outer side of the protein facing the bilayer while the proline is on  
259 the inner side of the protein promoting the formation of a kink in the transmembrane helix  
260 [36]. The motif “SP” in particular, increase the bending effect of proline significantly due to  
261 their hydrogen bond pattern [37], indeed due to the structural propriety, the motif is relatively  
262 rare in membrane proteins [37].

263

## 264 **Curlin repeats family**

265 Our model results in a  $\beta$ -solenoid structure, Fig. 8c DeBenedictis et al. in 2017 presented  
266 and discussed ab initio models for the Curlin repeats family members CsgA and CsgB [38],  
267 their best models is in agreement with our model (a direct comparison is difficult as the  
268 coordinates is not available of their model). The model is furthermore confirmed by the  
269 partial structure of the repeat units of CsgA published by Perov et al. [39] where they  
270 crystallize in parallel  $\beta$ -sheets with individual units situated perpendicular to the fibril axis  
271 (corresponding PDB IDs are 6G8C, 6G8D, 6G8E).

272

## 273 **Conclusion.**

274 The modelling of the unknown PFAM families was challenging. Only 10% of the datasets  
275 had a Pcons score equal or higher to 0.4; compared to 21% in the benchmark dataset.  
276 However, the differences between the two datasets have to be taken into account. It is  
277 known that a smaller MSA affects the prediction of contacts and known structures are biased  
278 towards the larger family [40] Indeed our “Unknown protein families” dataset shows a  
279 significant lower Neff score compared with the PDB benchmark set, Figure 9a. Moreover, in  
280 the Unknown protein set, there are more eukaryotic-specific protein families (Fig. 9b).

281

37 Structure Prediction of Repeats

38

282 **Figure9. Datasets comparisons.** a) Neff score comparison between the two datasets. b)

283 The variation in the membership to the three domains of life between the PFAM families of

284 the “Unresolved Proteins Dataset” and the “PDB dataset”.

285

286 Despite the significant improvement brought by deep-learning in contact prediction, there is

287 still room for improvement. The prediction of inter-domain contacts accuracy is often lower

288 than the intra-units one and the development of a model trained explicitly on repeats protein

289 datasets might improve the result. Furthermore, the folding part of the pipeline is a limiting

290 step, in particular for long proteins.

291 In our study, we performed a comprehensive coevolution analysis on repeat protein families,

292 and we show that PconsC4 contact-predictions method overcomes the traditional difficulties

293 of DCA methods for this class of proteins. We investigated the modelling of repeat units, and

294 we provided a “titration curve” for Pcons score for repeat proteins. Finally, we test our

295 pipeline on PFAM families without protein structures showing its usefulness in providing new

296 structural information.

297

## 298 **Materials and Methods**

### 299 **Datasets generation**

300 The repeat protein dataset was generated starting from the 3585 reviewed entries in

301 RepeatsDB [14,21], <http://protein.bio.unipd.it/repeatsdb-lite/dataset>. The proteins of class I

302 and II were removed, and then the dataset was homology reduced using CD-HIT [22] at 40%

303 identity resulting in 819 repeats regions. From this “complete region dataset” two others

304 datasets were generated: I) A “single unit” dataset with one repeat unit for each region; II) A

305 “double unit” dataset with a pair of units per each repeat region. In the two derived datasets,

306 the representative units were selected, avoiding or at least minimizing, the presence of

## 40 Structure Prediction of Repeats

41

307 insertions.

308 The non-resolved repeats protein family dataset was generated, collecting all the repeat  
309 proteins families with missing structural information present in PFAM [23] in May 2019 and  
310 removing the domains with a significant overlap with the disorder prediction. It results in 51  
311 protein families. The representative sequence for each family of repeat was chosen for  
312 matching these criteria: 1) select the most common architecture; 2) Include when possible at  
313 least three repeat units.

314

## 315 Multiple sequence alignment (MSA)

316 The multiple sequence alignments (MSA) were carried out using HHblits [24] with an E-value  
317 cutoff of 0.001 against the Uniclust30\_2017\_04 database [25]. The number of effective  
318 sequences of the alignment, expressed as Neff-score, was calculated by HHblits and used  
319 for subsequent analysis.

320

## 321 Contact prediction and models generation

322 The protein models were generated following the PconsFold2 protocol of [26]. The  
323 secondary structure of the repeat regions was predicted by PSIPred [27]. Protein contacts  
324 were calculated with PconsC4 [18] and together with the secondary structure predictions  
325 were used as input for ConFold [28]. The modelling was run using the top scoring 1.5 L  
326 contracts where L is the length of the modelled regions and the two-stage modelling.

327

## 328 Contacts analysis

329 A protein contact was defined as two residues having a beta carbon distance equal or lower  
330 than 8Å in the PDB structure and farther than 5 residues in the sequence. Using this

## 43 Structure Prediction of Repeats

44

331 definition, we assess the number of correctly predicted contacts (the Positively Predicted  
332 value (PPV)) taking into account the top-scoring 1.5 L contracts.

333 In the intra/inter unit contacts analysis, the predicted contacts of each protein were divided  
334 between i) intra-unit contacts, if between residues inside the same unit; ii) inter-units if the  
335 residues are in different repeat units. The units mapping was taken from the RepeatsDB  
336 database [14]. In this analysis, we calculate the number of intra- and inter-unit contacts  
337 existing in the PDB structure, and we selected the same number of intra- and inter-units  
338 predictions. The PPV was then calculated as the number of correct contacts over the  
339 number of the selected contacts.

## 340 Homology modelling

341 Templates for homology modelling were searched by HHsearch [29] using the HHpred web-  
342 server with default settings on PDB\_mmCIF70\_3\_Aug database. Subsequently, the models  
343 were generated by HHpred [30].

## 344 Protein models analysis

345 The model quality was assessed using Pcons [20]. We download and installed Pcons. With  
346 the option -d we predicted the quality among the model in the stage2 folder generated by  
347 Confold. Pcons uses a clustering method, and the score is simply the average structural  
348 similarity to all models, as measured by the S-score.

349 The TM-score was calculated using TMalign [31]. To ensure that the protein structure and  
350 the model were properly aligned the option -l was used, providing a local protein alignment  
351 for the two sequences.

352

## 353 Bibliography

354 1. Heringa J. Detection of internal repeats: how common are they? *Curr Opin Struct Biol.* 1998;8:

## 46 Structure Prediction of Repeats

47

355 338–345.

- 356 2. Strand M, Prolla TA, Liskay RM, Petes TD. Destabilization of tracts of simple repetitive DNA in  
357 yeast by mutations affecting DNA mismatch repair. *Nature*. 1993;365: 274–276.
- 358 3. Pâques F, Leung W-Y, Haber JE. Expansions and Contractions in a Tandem Repeat Induced by  
359 Double-Strand Break Repair. *Molecular and Cellular Biology*. 1998. pp. 2045–2054. doi:10.1128/  
360 mcb.18.4.2045
- 361 4. Schaper E, Gascuel O, Anisimova M. Deep conservation of human protein tandem repeats within  
362 the eukaryotes. *Mol Biol Evol*. 2014;31: 1132–1148.
- 363 5. E.M. Marcotte, M. Pellegrini, T.O. Yeates, D. Eisenberg. A census of protein repeats. *J Mol Biol*.  
364 1999;293: 151–160.
- 365 6. Björklund AK, Ekman D, Elofsson A. Expansion of protein domain repeats. *PLoS Comput Biol*.  
366 2006;2: e114.
- 367 7. Andrade MA, Perez-Iratxeta C, Ponting CP. Protein Repeats: Structures, Functions, and  
368 Evolution. *Journal of Structural Biology*. 2001. pp. 117–131. doi:10.1006/jsbi.2001.4392
- 369 8. Stirnimann CU, Petsalaki E, Russell RB, Müller CW. WD40 proteins propel cellular networks.  
370 *Trends Biochem Sci*. 2010;35: 565–574.
- 371 9. Li J, Mahajan A, Tsai M-D. Ankyrin repeat: a unique motif mediating protein-protein interactions.  
372 *Biochemistry*. 2006;45: 15168–15178.
- 373 10. Mosavi LK, Cammett TJ, Desrosiers DC, Peng Z-Y. The ankyrin repeat as molecular architecture  
374 for protein recognition. *Protein Sci*. 2004;13: 1435–1448.
- 375 11. Persi E, Wolf YI, Koonin EV. Positive and strongly relaxed purifying selection drive the evolution  
376 of repeats in proteins. *Nat Commun*. 2016;7: 13570.
- 377 12. Kajava AV. Review: Proteins with Repeated Sequence—Structural Prediction and Modeling.  
378 *Journal of Structural Biology*. 2001. pp. 132–144. doi:10.1006/jsbi.2000.4328
- 379 13. Kajava AV. Tandem repeats in proteins: From sequence to structure. *Journal of Structural*  
380 *Biology*. 2012. pp. 279–288. doi:10.1016/j.jsb.2011.08.009
- 381 14. Paladin L, Hirsh L, Piovesan D, Andrade-Navarro MA, Kajava AV, Tosatto SCE. RepeatsDB 2.0:  
382 improved annotation, classification, search and visualization of repeat protein structures. *Nucleic*  
383 *Acids Res*. 2017;45: 3613.
- 384 15. Abriata LA, Tamò GE, Monastyrskyy B, Kryshchak A, Dal Peraro M. Assessment of hard  
385 target modeling in CASP12 reveals an emerging role of alignment-based contact prediction  
386 methods. *Proteins*. 2018;86 Suppl 1: 97–112.
- 387 16. Pazos F, Helmer-Citterich M, Ausiello G, Valencia A. Correlated mutations contain information  
388 about protein-protein interaction. *J Mol Biol*. 1997;271: 511–523.
- 389 17. Espada R, Parra RG, Mora T, Walczak AM, Ferreira DU. Capturing coevolutionary signals  
390 in repeat proteins. *BMC Bioinformatics*. 2015;16: 207.
- 391 18. Michel M, Hurtado DM, Elofsson A. PconsC4: fast, accurate, and hassle-free contact predictions.  
392 *Bioinformatics*. 2018. doi:10.1093/bioinformatics/bty1036
- 393 19. Baldassi C, Zamparo M, Feinauer C, Procaccini A, Zecchina R, Weigt M, et al. Fast and accurate  
394 multivariate Gaussian modeling of protein families: predicting residue contacts and protein-  
395 interaction partners. *PLoS One*. 2014;9: e92721.
- 396 20. Lundström J, Rychlewski L, Bujnicki J, Elofsson A. Pcons: a neural-network-based consensus  
397 predictor that improves fold recognition. *Protein Sci*. 2001;10: 2354–2362.



## 49 Structure Prediction of Repeats

50

- 398 21. Hirsh L, Paladin L, Piovesan D, Tosatto SCE. RepeatsDB-lite: a web server for unit annotation of  
399 tandem repeat proteins. *Nucleic Acids Res.* 2018;46: W402–W407.
- 400 22. Li W, Godzik A. Cd-hit: a fast program for clustering and comparing large sets of protein or  
401 nucleotide sequences. *Bioinformatics.* 2006. pp. 1658–1659. doi:10.1093/bioinformatics/btl158
- 402 23. El-Gebali S, Mistry J, Bateman A, Eddy SR, Luciani A, Potter SC, et al. The Pfam protein families  
403 database in 2019. *Nucleic Acids Res.* 2019;47: D427–D432.
- 404 24. Remmert M, Biegert A, Hauser A, Söding J. HHblits: lightning-fast iterative protein sequence  
405 searching by HMM-HMM alignment. *Nature Methods.* 2012. pp. 173–175.  
406 doi:10.1038/nmeth.1818
- 407 25. Mirdita M, von den Driesch L, Galiez C, Martin MJ, Söding J, Steinegger M. Uniclust databases of  
408 clustered and deeply annotated protein sequences and alignments. *Nucleic Acids Res.* 2017;45:  
409 D170–D176.
- 410 26. Bassot C, Menendez Hurtado D, Elofsson A. Using PconsC4 and PconsFold2 to Predict Protein  
411 Structure. *Curr Protoc Bioinformatics.* 2019; e75.
- 412 27. McGuffin LJ, Bryson K, Jones DT. The PSIPRED protein structure prediction server.  
413 *Bioinformatics.* 2000. pp. 404–405. doi:10.1093/bioinformatics/16.4.404
- 414 28. Adhikari B, Bhattacharya D, Cao R, Cheng J. CONFOLD: Residue-residue contact-guided ab  
415 initio protein folding. *Proteins.* 2015;83: 1436–1449.
- 416 29. Soding J, Biegert A, Lupas AN. The HHpred interactive server for protein homology detection and  
417 structure prediction. *Nucleic Acids Research.* 2005. pp. W244–W248. doi:10.1093/nar/gki408
- 418 30. Zimmermann L, Stephens A, Nam S-Z, Rau D, Kübler J, Lozajic M, et al. A Completely  
419 Reimplemented MPI Bioinformatics Toolkit with a New HHpred Server at its Core. *J Mol Biol.*  
420 2018;430: 2237–2243.
- 421 31. Zhang Y, Skolnick J. TM-align: a protein structure alignment algorithm based on the TM-score.  
422 *Nucleic Acids Res.* 2005;33: 2302–2309.
- 423 32. Ronneberger O, Fischer P, Brox T. U-Net: Convolutional Networks for Biomedical Image  
424 Segmentation. *Lecture Notes in Computer Science.* 2015. pp. 234–241. doi:10.1007/978-3-319-  
425 24574-4\_28
- 426 33. Skwark MJ, Raimondi D, Michel M, Elofsson A. Improved contact predictions using the  
427 recognition of protein like contact patterns. *PLoS Comput Biol.* 2014;10: e1003889.
- 428 34. Pettersen EF, Goddard TD, Huang CC, Couch GS, Greenblatt DM, Meng EC, et al. UCSF  
429 Chimera--a visualization system for exploratory research and analysis. *J Comput Chem.* 2004;25:  
430 1605–1612.
- 431 35. Yeats C, Bentley S, Bateman A. New knowledge from old: in silico discovery of novel protein  
432 domains in *Streptomyces coelicolor*. *BMC Microbiol.* 2003;3: 3.
- 433 36. von Heijne G. Proline kinks in transmembrane alpha-helices. *J Mol Biol.* 1991;218: 499–503.
- 434 37. Deupi X, Olivella M, Govaerts C, Ballesteros JA, Campillo M, Pardo L. Ser and Thr Residues  
435 Modulate the Conformation of Pro-Kinked Transmembrane  $\alpha$ -Helices. *Biophysical Journal.* 2004.  
436 pp. 105–115. doi:10.1016/s0006-3495(04)74088-6
- 437 38. DeBenedictis EP, Ma D, Keten S. Structural predictions for curli amyloid fibril subunits CsgA and  
438 CsgB. *RSC Adv.* 2017;7: 48102–48112.
- 439 39. Perov S, Lidor O, Salinas N, Golan N, Tayeb-Fligelman E, Deshmukh M, et al. Structural Insights  
440 into Curli CsgA Cross- $\beta$  Fibril Architecture Inspired Repurposing of Anti-amyloid Compounds as  
441 Anti-biofilm Agents. doi:10.1101/493668

52 Structure Prediction of Repeats

53

- 442 40. Orlando G, Raimondi D, Vranken WF. Observation selection bias in contact prediction and its  
443 implications for structural bioinformatics. Sci Rep. 2016;6: 36679.

444

445

55 Structure Prediction of Repeats  
56

## 446 **Supporting Information**

447

448 **Table S1. Unknown protein family dataset.** In the columns are reported respectively: the UniProt ID  
449 of the modelled sequence, the PFAM family, the Pcons score.

450

451 **Figure S1 Target/template alignments.** Target/template alignments for the homology modelling.

452

453 **Figure S2 Amino Acid frequency of the single domain architecture sequences.** From the logo is  
454 possible recognize two SPW domains, one of them degenerated (in particular the first Serine in the  
455 second motif) that is not recognized by PFAM.

456

## CLASS III

---

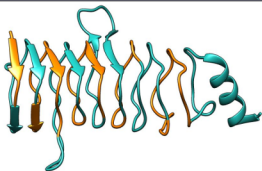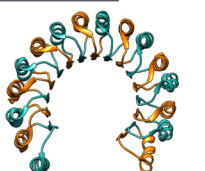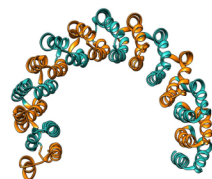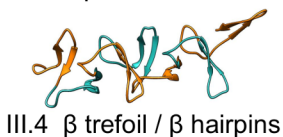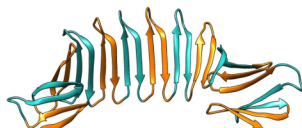

## CLASS IV

---

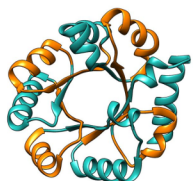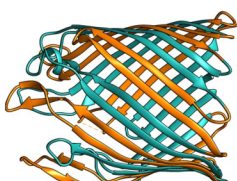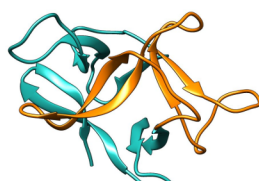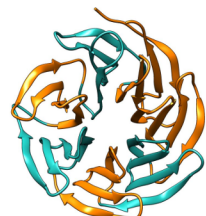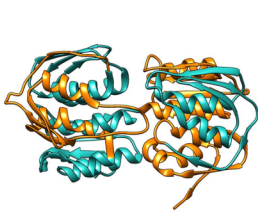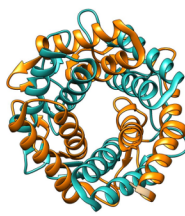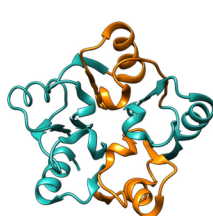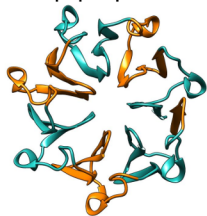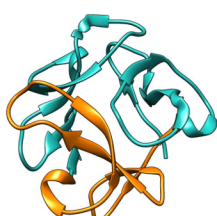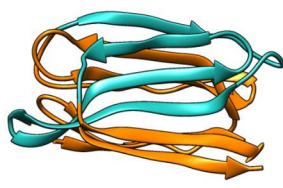

## CLASS V

---

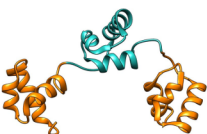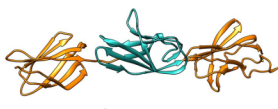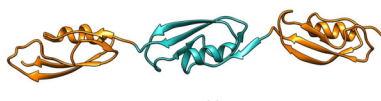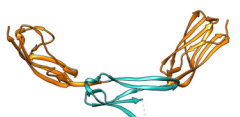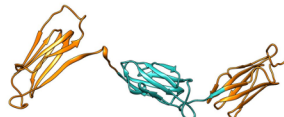

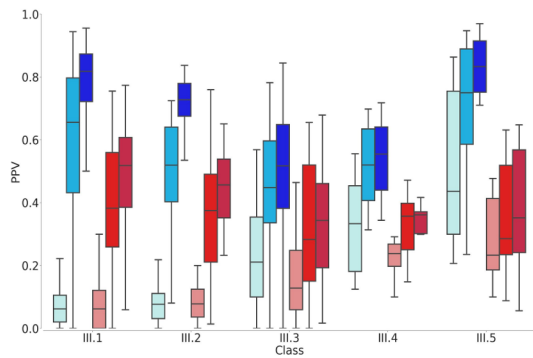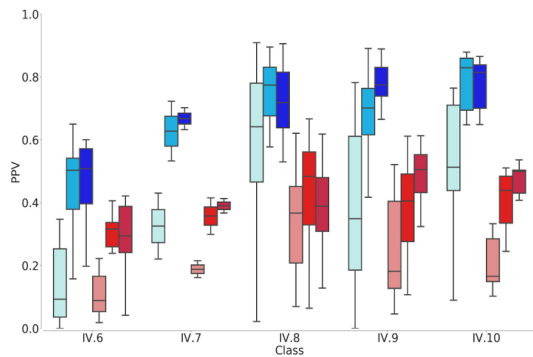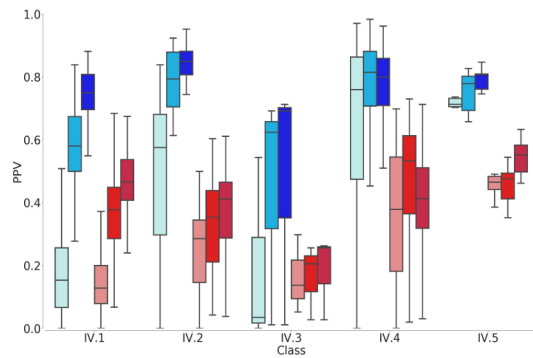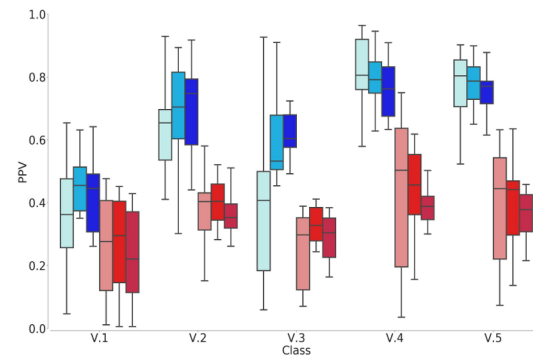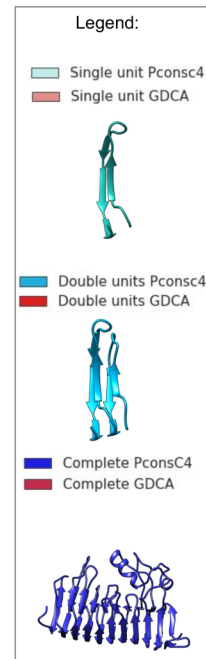

GaussDCA

1wg0\_A.0 (PDB: 1wg0)  
PPV = 0.37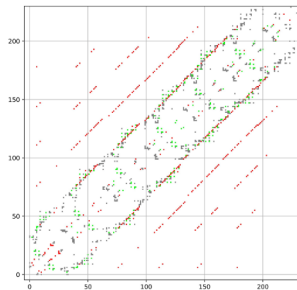

PconsC4

1wg0\_A.0 (PDB: 1wg0)  
PPV = 0.51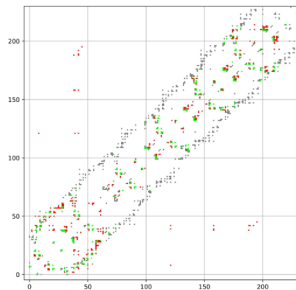

GaussDCA

2prt\_A.0 (PDB: 2prt)  
PPV = 0.16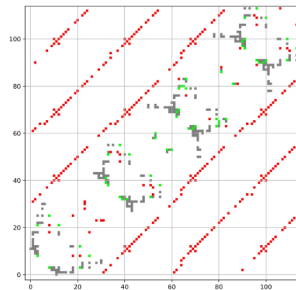

PconsC4

2prt\_A.0 (PDB: 2prt)  
PPV = 0.58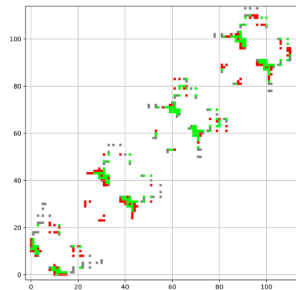

GaussDCA

4hbd\_A.0 (PDB: 4hbd)  
PPV = 0.34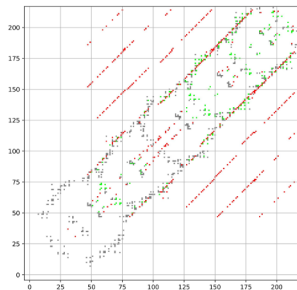

PconsC4

4hbd\_A.0 (PDB: 4hbd)  
PPV = 0.44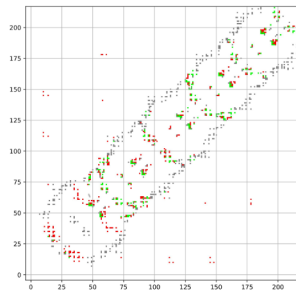

GaussDCA

4l3f\_D.0 (PDB: 4l3f)  
PPV = 0.51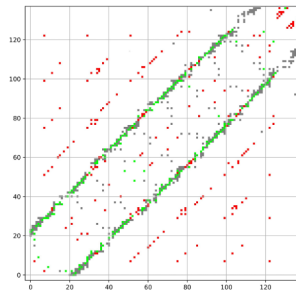

PconsC4

4l3f\_D.0 (PDB: 4l3f)  
PPV = 0.69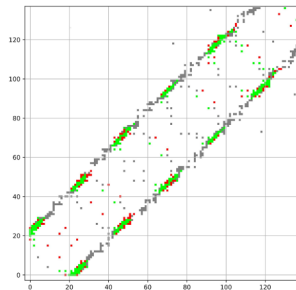

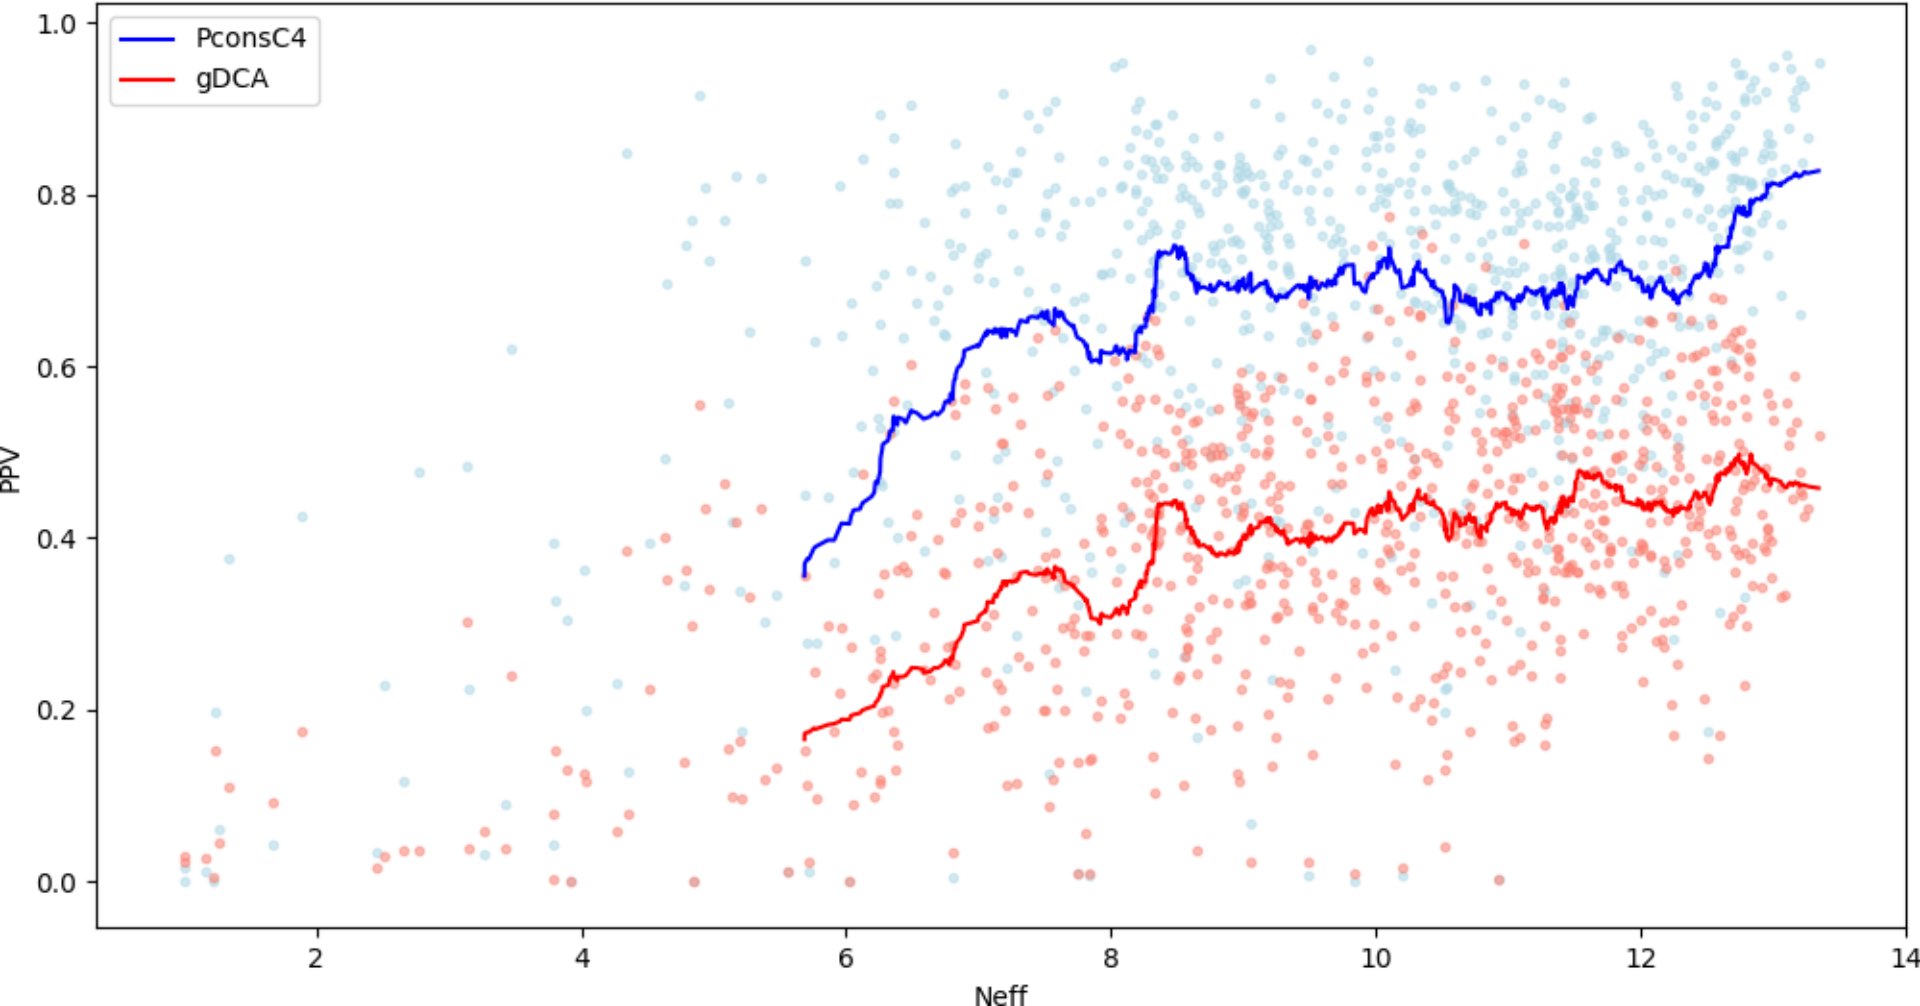

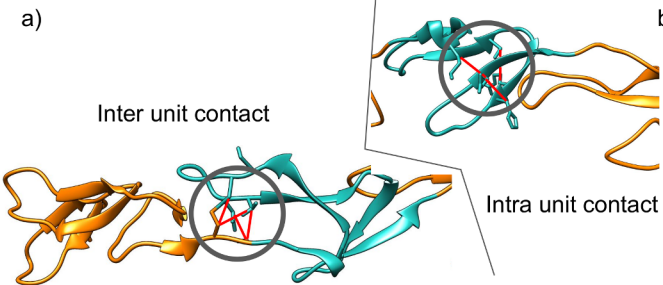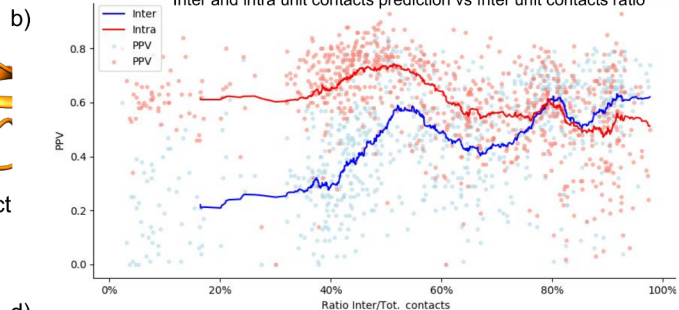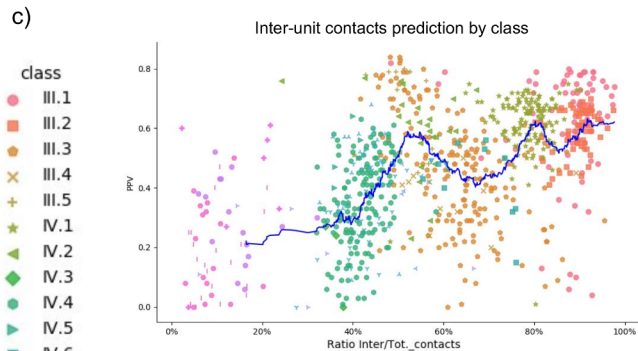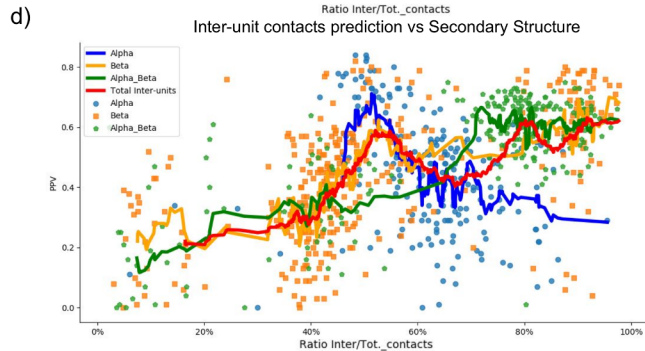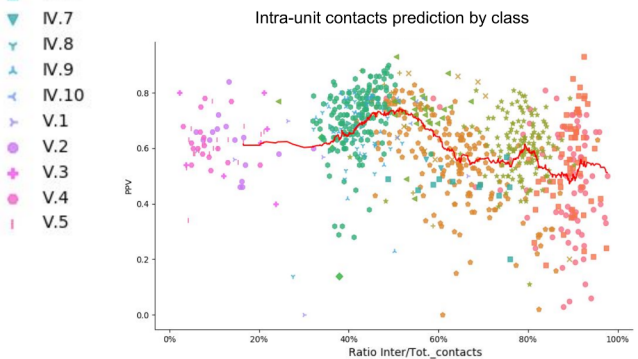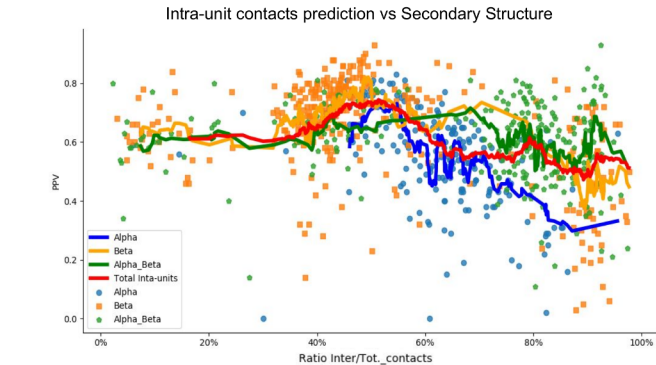



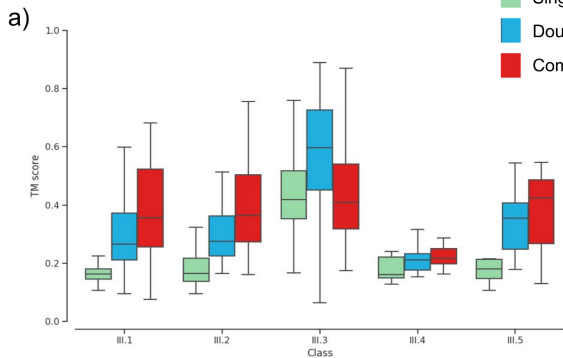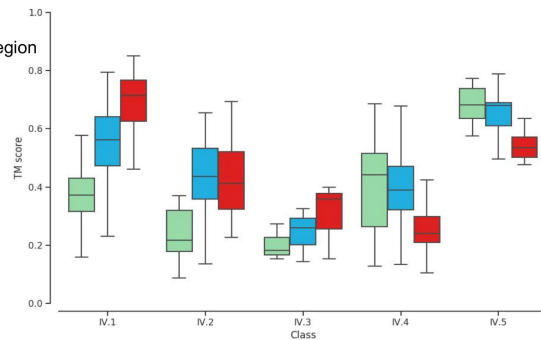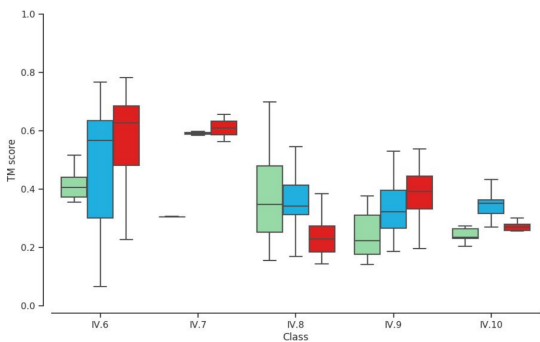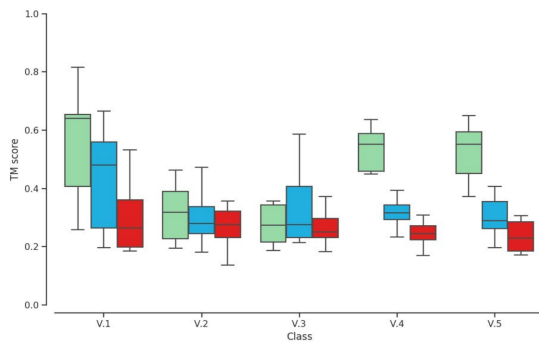

b)

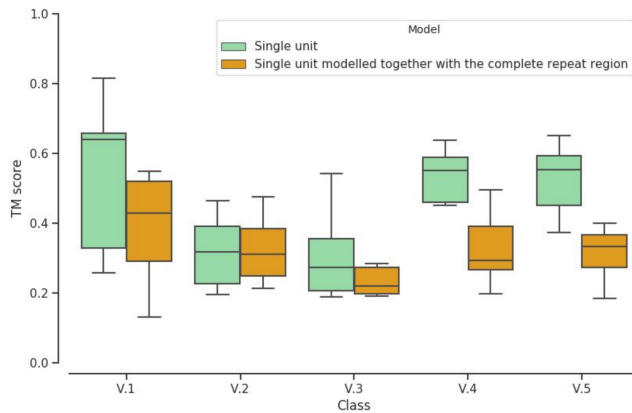

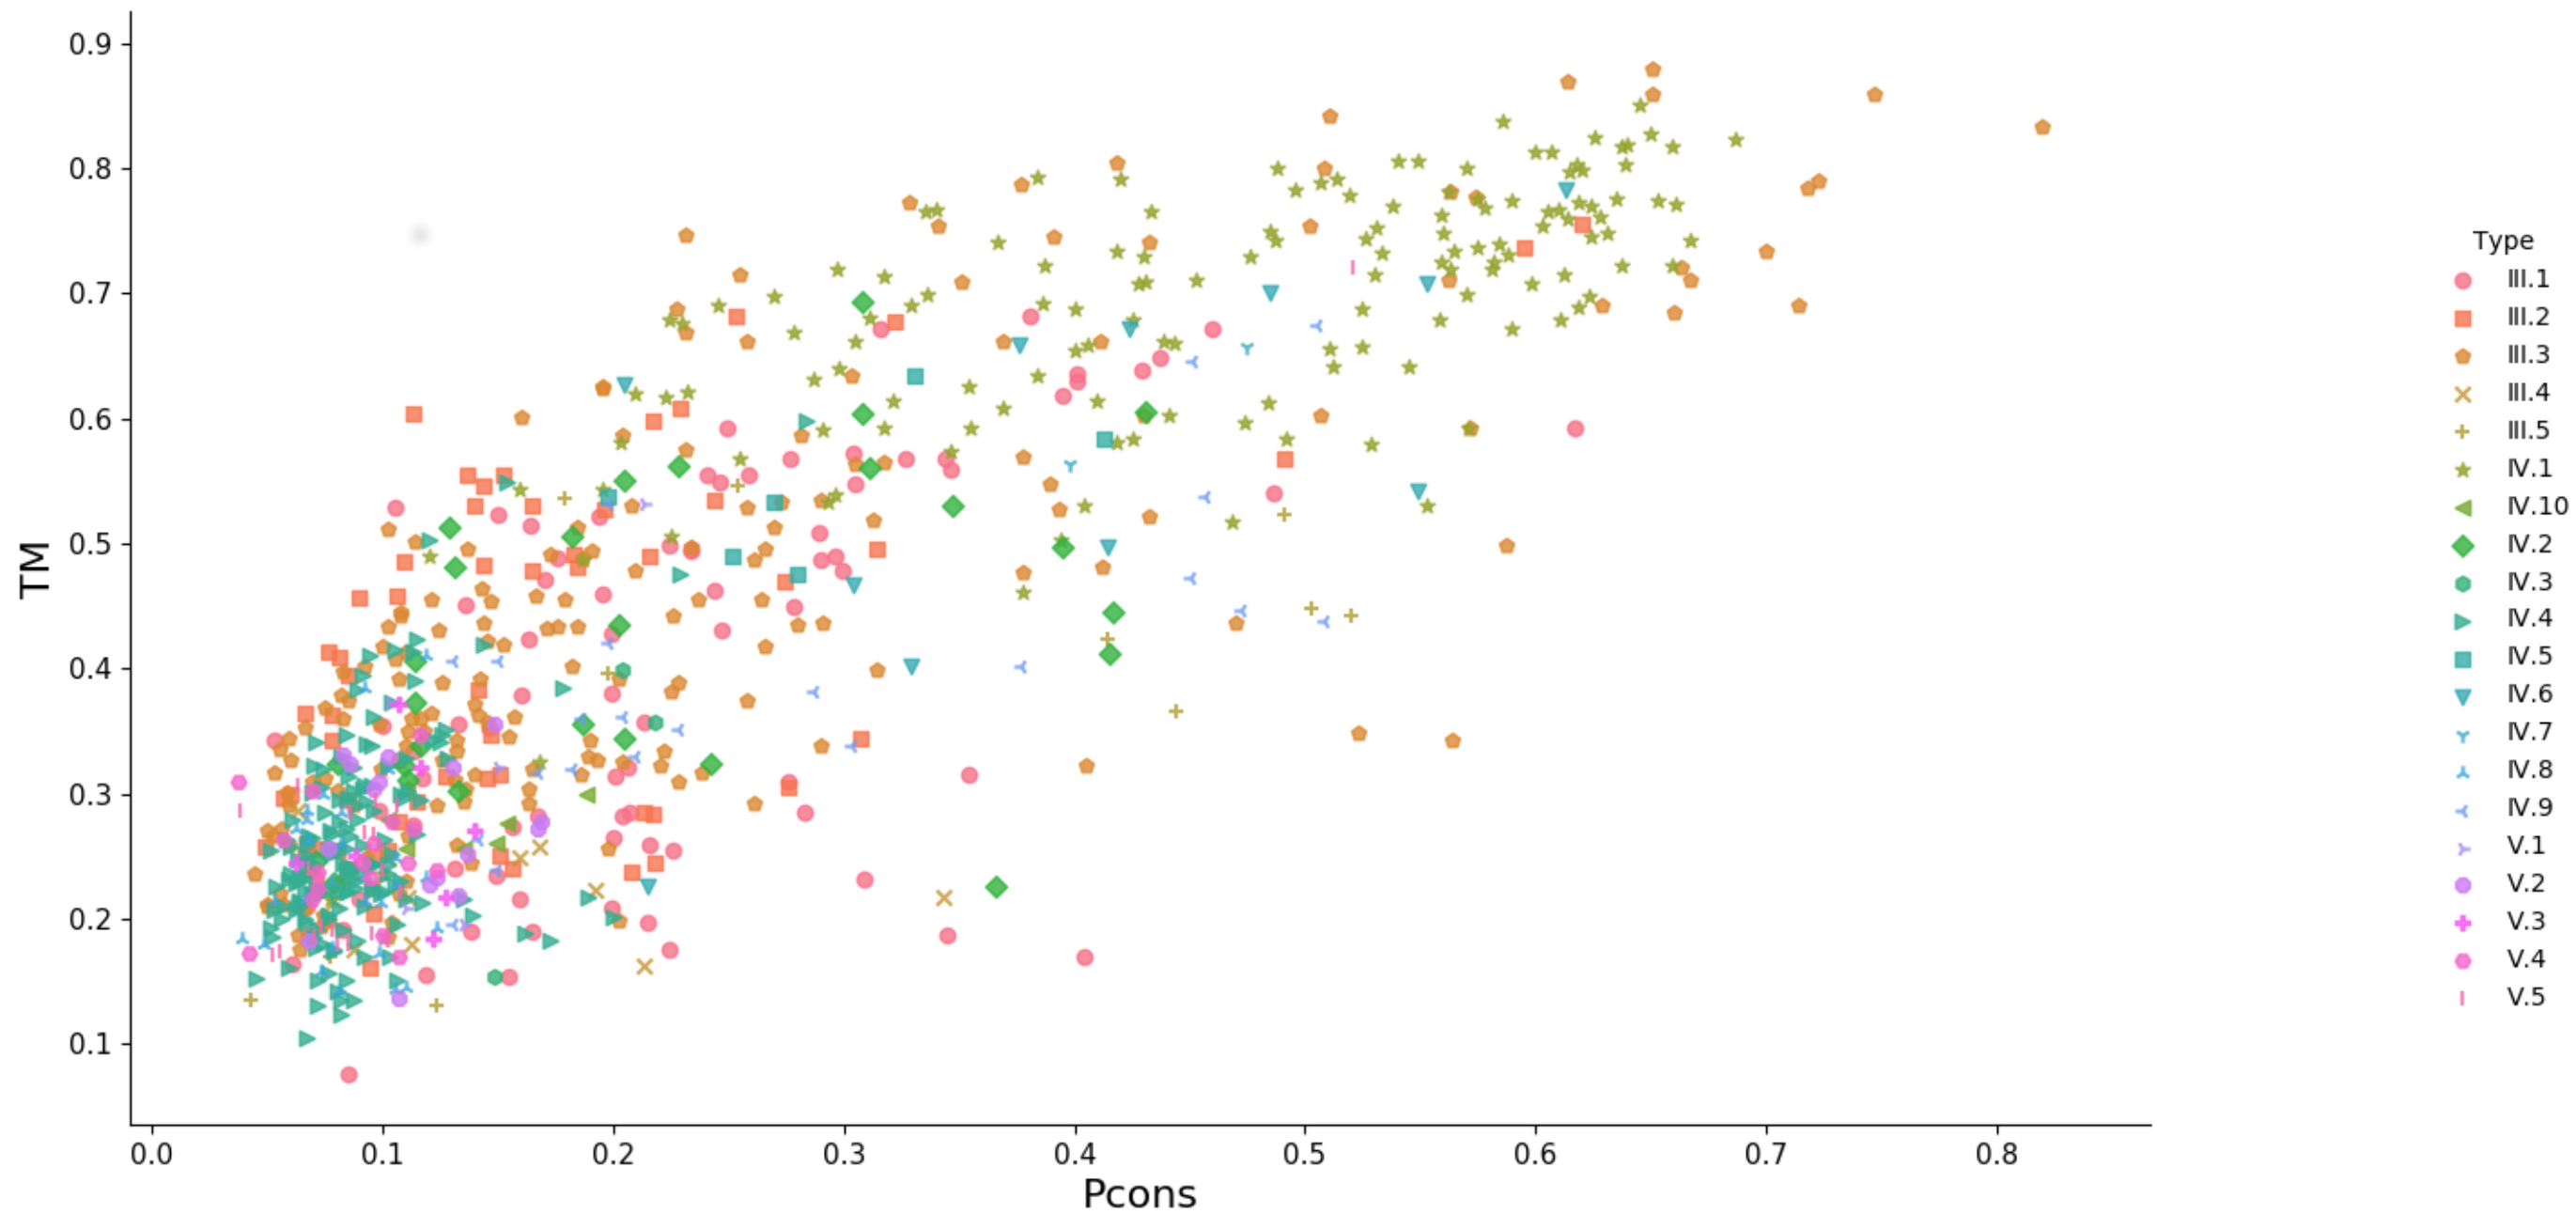

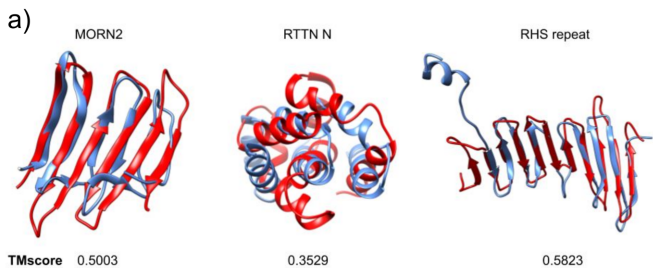

 Contact Based Model

 Homology Model

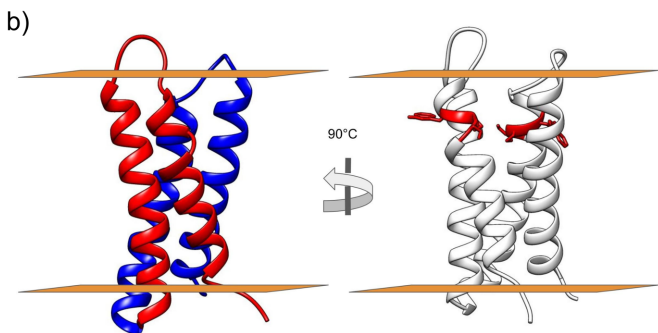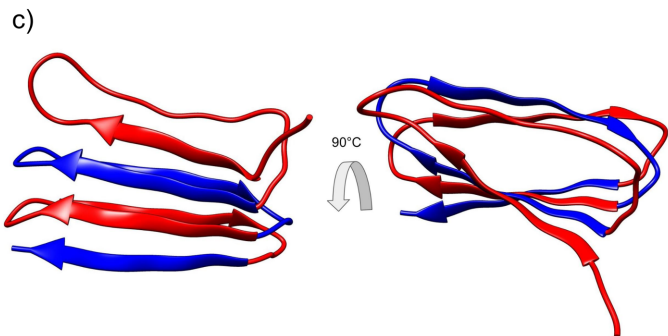

a)

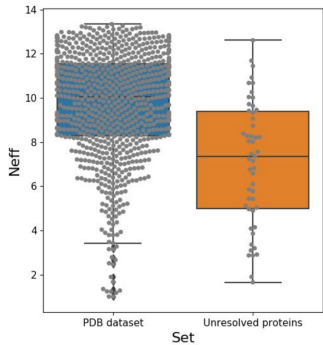

b)

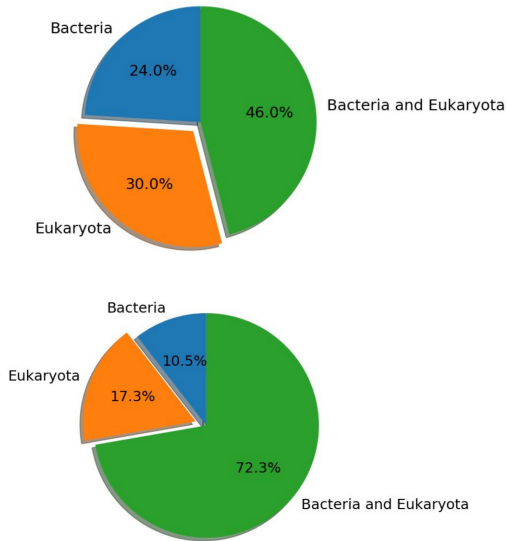

a) MORN 2, PF07661, target Q8RH85

**1MUF\_A\_SET9 (2.1.1.43); SET domain, histone lysine methyltransferase; HET: MSE; 2.26A (Homo sapiens) SCOP: b.76.2.1, b.85.7.1**  
Probability: 99.37%, E-value: 1.3e-13, Score: 73.11, Aligned cols: 70, Identities: 21%, Similarity: 0.357,

```
Q ss_pred          CcCeEEEEcCCCcEEEEEEeCCEEEeEeEecCcEeEEEEEeCCEeEE-ECECCCCCEEEEEeC
Q Q8RH85           1   QVGVEKSYEESGLELSCSYKNGKMDGIAKIYYQNGVEIEDPVKNGERNGVIK-VYDENGKLVRQATFKN 70 (70)
Q Consensus        1   --G-----g-----g-----g-----g-----g-----g-----y--- 70 (70)
                  ++|.+.|+++|.+.+.|.+.+.|+.+.|+++|.+.+.|.+.+.|+.+.|+++|.+.+.|++
Q Consensus        11  --G-----G-----g-----g-----g-----g-----g-----g----- 81 (257)
T Q8RH85           11  LNGPAQYEYDTDGRLIFKGQYKDNIRHGVCWIYPDGSLVGEVNEDGEMTGEKIAYVYPDERTALYGKFID 81 (257)
T ss_dssp          EEEEEEECTTCEEEEEEEETEEEEEEECTTSCEEEEECCTTSCSEEEEEEECTTSEEEEEEEET
T ss_pred          EeeeEEEECCCCCEEEEEEEcCeEeEeEeEeCCcEeEEEEcCCcCeceEEEECCCCCEEEEEEE
```

b) RTTN N, PF14726, target W5P499

**4U2X\_D\_eVP24, KPNA5C; eVP24, importin alpha6, immune antagonist; 3.153A (Zaire ebolavirus); Related PDB entries: 4U2X\_F\_4U2X\_E**  
Probability: 94.16%, E-value: 0.22, Score: 31.77, Aligned cols: 97, Identities: 7%, Similarity: 0.015,

```
Q ss_pred          Ch#####ccccch#####cCCCCCCCC#####cCh#####-----H###
Q W5P499           1   EIRERALRSLCKLEHSLVCGADLASHRLLFLHLLEWFNFPSVPMKEVLGLLSRLVKYPPAVQ-----HLVD 68 (97)
Q Consensus        1   EIR-RAL-nI-sKL-ggK---dL-----Ll--Ll-Wfn-----VL-Ll--L-k-----l-- 68 (97)
                  ++|.+.|+.+.+.+.+.+.+.+.+.|+.+.+.+.+.+.+.+.+.|+.+.+.+.+.+.+.+.+.  +..
Q Consensus        65  -----a---L---l-----l-----l-----l-----l-----l----- 144 (175)
T W5P499           65  RTRKEAANAITNATSGGTPEQIRYLVALGCIKPLCDLLTVMDSKIVQVALNGLENILRLGEQESKQNGIGINPYCALIEE 144 (175)
T ss_dssp          #####c#####c#####GGGCSC#####c-----CCSC#####
T ss_pred          #####cCCC#####cCCC#####cCCC#####cCh#####cCh#####
```

```
Q ss_pred          c#####hhcC#####hC
Q W5P499           69  LGAVEFLSKIRPNVEPNLQAEIDGLDGL 97 (97)
Q Consensus        69  -G--fL--Lr--j-----id-I---l 97 (97)
                  .|+.+.+.+.+.+.+.+.+.|+.+.+.+.+.+.+.+.+.|+.+.+.+.+.+.+.+.+.
Q Consensus        145 -----l--l-----y---a---l--l 173 (175)
T W5P499           145  AVGLDKIEFLQSHENQEIYQKAFDLIEHY 173 (175)
T ss_dssp          TT#####TTCS#####
T ss_pred          hC#####hC#####
```

c) RHS repeat, PF05593, target A0A1G0MXS8

**5KIS\_B\_YenB, RHS2; ABC toxin, RHS, TOXIN; 2.4A (Yersinia entomophaga)**  
Probability: 99.47%, E-value: 4.2e-14, Score: 98.25, Aligned cols: 125, Identities: 20%, Similarity: 0.284,

```
Q ss_pred          CccCceEEEECCCCCEEEEECCCCCEEEecCCCCEEEECCCCCEEEeC-----CCceEEEEcCCCCeEEE
Q A0A1G0MXS8      1   YDAGRRNSSSDSNGRYLQYSYDTTGKKTKIYPEGSVSVSYSDGTGRLATITNG-----GGRTYGSYDKLGRRSKLT 74 (127)
Q Consensus        1   yd--g-----ydg-----ydg-----ydg-----ydg-----ydg-----ydg----- 74 (127)
                  ++.+.+.+.+.+.+.+.+.|+.+.+.+.+.+.+.+.+.|+.+.+.+.+.+.+.+.+.|+.+.+.+.+.+.+.+.+.
T Consensus        214 -----YD--GrL---td--G---yYD--GrL-----YD--GrL----- 293 (965)
Q Consensus        214 GEGASAWNDLSGEEYVTLTTADATGVLTTDAKGNIQRVRYDVAGLSGSHLTVHDRTEQVIVKSLTYSAAGQKQRED 293 (965)
T ss_dssp          SSS#####TBCSCEEEEEEECTTSCEEEEEECTTSCEEEEEECTTSCEEEEEECTTSCEEEEEECTTSCEEEEEE
T ss_pred          CcccChhhhcCCCceEEEECCCCCEEEecCCCCEEEECCCCCEEEeCcccceEEEEEECCCCCEEE
```

```
Q ss_pred          cCCCCEEEECCC-CCEEEEEecC-----CCeEEEEEECCCCCEEEcCCC
Q A0A1G0MXS8      75  YPSGATANYADAA-GRLTSLEHKQS-----NGRIIASFAYTHDNYGNRMTKTEPDG 125 (127)
Q Consensus        75  -----ydg-----ydg-----ydg-----ydg-----ydg-----ydg----- 125 (127)
                  .+.+.+.|.|.|. |+.+.+.+.+.+.+.+.+.|+.+.+.+.+.+.+.+.+.|+.+.+.+.+.+.+.+.+.
Q Consensus        294 -----yYD--grL-----yYD--GrL----- 350 (965)
T A0A1G0MXS8      294  HGNGVITYTYEAETQRLTGIRTERPAHASGAKVLQDLRYEEEDPVGNVLKITNDAE 350 (965)
T ss_dssp          ETTSCEEEEEECTTCCEEEEEEECTTCTTCEEEEEEEECTTSCEEEEEECTTSCEEEEEECTTSC
T ss_pred          eCCcEEEEEeCCCCeEEEEeCccccccccceeeEeEEEECCCCCEEEeCcc
```

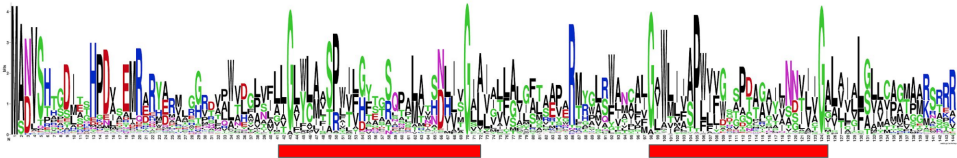

SPW  
motif

SPW  
motif

TableS1

| Uniprot entry | Pfam    | Pcons_score |
|---------------|---------|-------------|
| S6TLB9        | PF14882 | 0.071       |
| W5U916        | PF15907 | 0.072       |
| D7MCA5        | PF07725 | 0.079       |
| A0A2A2LSA2    | PF14625 | 0.08        |
| R5P8A5        | PF07538 | 0.081       |
| G1XIQ8        | PF13446 | 0.083       |
| A0A0B0HSH2    | PF13753 | 0.094       |
| J1S4N0        | PF11966 | 0.094       |
| U5QIU9        | PF06739 | 0.096       |
| A0A1A9WU23    | PF02363 | 0.102       |
| A0A252E8A5    | PF17660 | 0.103       |
| L8TNF3        | PF08310 | 0.108       |
| W4LGN0        | PF14312 | 0.111       |
| U7Q0S5        | PF10281 | 0.116       |
| D3UXB8        | PF07634 | 0.117       |
| Q29AL9        | PF14939 | 0.121       |
| A0A1Z4C3E9    | PF17164 | 0.122       |
| Q9NZZ2        | PF04680 | 0.123       |
| D5SU36        | PF07639 | 0.139       |
| G3VIY2        | PF00400 | 0.143       |
| D3BR65        | PF00526 | 0.15        |
| I3BT02        | PF03640 | 0.153       |
| A0A094KVK3    | PF00880 | 0.159       |
| R6YH89        | PF14903 | 0.16        |
| O64827        | PF18868 | 0.164       |
| A0A257INW4    | PF13573 | 0.165       |
| A7S4G3        | PF07016 | 0.167       |
| R2SEH8        | PF18780 | 0.168       |
| T0NQR8        | PF08043 | 0.176       |
| A0A1V1NWB1    | PF08309 | 0.179       |
| A0A0L7M9B8    | PF07981 | 0.188       |
| A7RAI0        | PF06598 | 0.2         |
| G1RYA9        | PF06049 | 0.209       |
| S7J9T7        | PF02415 | 0.215       |
| V5CQL0        | PF03406 | 0.232       |
| A0A1I7SWM5    | PF00839 | 0.251       |
| Q7RTC2        | PF12135 | 0.252       |
| Q8PXT0        | PF06848 | 0.253       |
| W5N853        | PF03128 | 0.253       |
| Q6YQH3        | PF11178 | 0.262       |
| R7MCC4        | PF13475 | 0.278       |
| Q6P6X2        | PF10578 | 0.295       |
| H9GJM4        | PF13330 | 0.319       |
| U2FCE1        | PF12779 | 0.355       |
| F3GDU0        | PF00818 | 0.392       |
| A0A1G0MXS8    | PF05593 | 0.407       |
| W5P499        | PF14726 | 0.49        |
| Q8EIH3        | PF07012 | 0.576       |
| A0A2A3HD64    | PF03779 | 0.674       |
| Q8RH85        | PF07661 | 0.711       |
| W5Q8K9        | PF15390 | 0.079       |
